# Supplementary material for: GroEL is an immunodominant surface-exposed antigen of Rickettsia typhi
Source: PubMed Central journal article supplement (PMC8191997; doi:10.1371/journal.pone.0253084), 2021-06-10

**Original Image of Fig 3A.**

Proteins in the lysate of *R. typhi* were digested with Proteinase K for indicated periods. Control bacterial lysate was left undigested. A Western Blot was performed. The membrane was incubated with the BNI52 antibody followed by the incubation with a HRP-labeled secondary antibody.

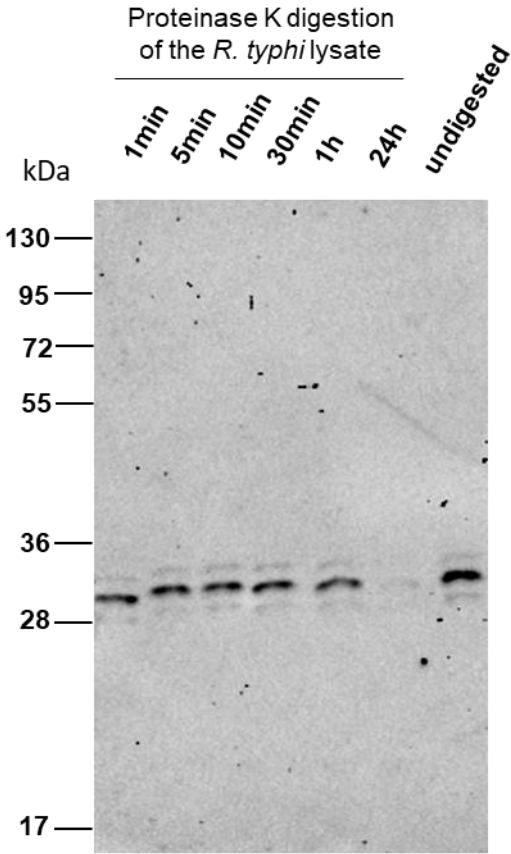

**Original Images of Fig S2B.**

Purified GroEL (1  $\mu$ g), OmpB p32 peptide (1 and 3  $\mu$ g) were applied to SDS Page and Western blotting. The membranes were incubated with BNI52 (left) or a polyhistidine antibody (right).

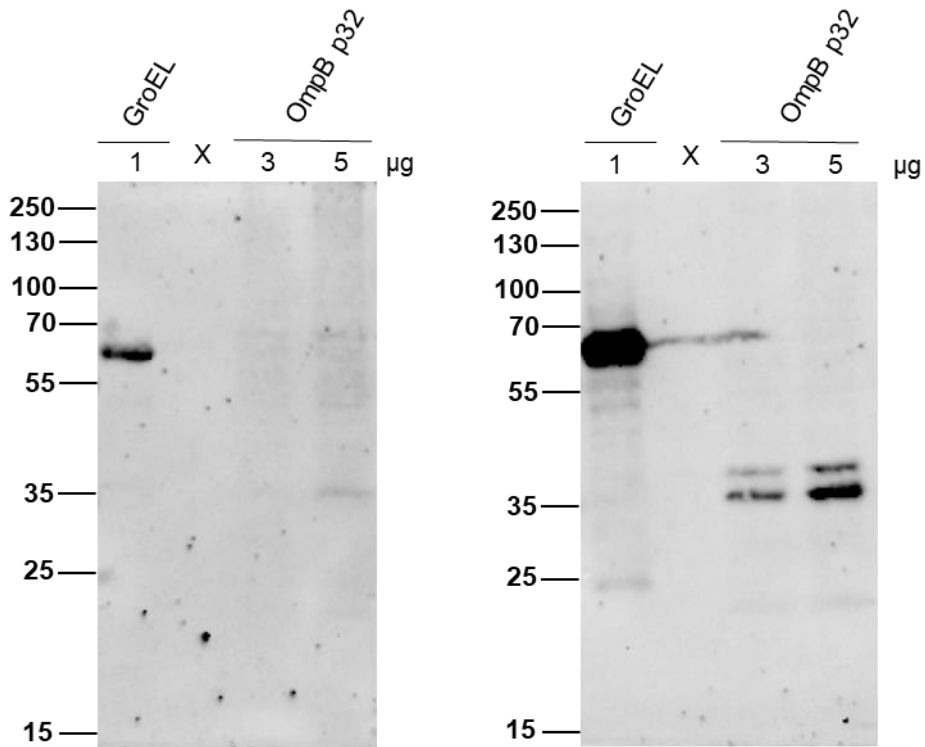

Supplement: pone.0253084.s004.pdf [file pone.0253084.s004.pdf]
